# Supplementary material for: CalloseMeasurer: a novel software solution to measure callose deposition and recognise spreading callose patterns
Source: PubMed Central journal article supplement (PMC3571893; doi:10.1186/1746-4811-8-49), 2012-12-17
Supplement: 1746-4811-8-49-S1.pdf [file 1746-4811-8-49-S1.pdf]

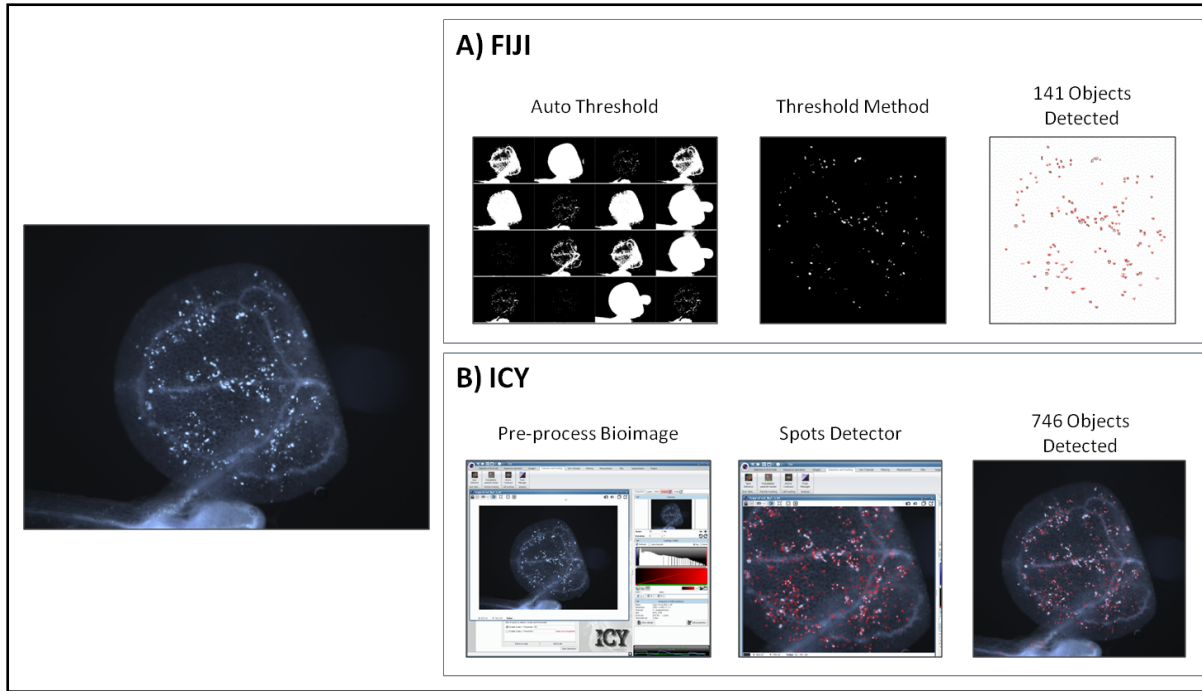

**Figure 1** Detecting callose deposition using FIJI and ICY

**(A)** Detecting callose deposits using FIJI – functions such as “Auto Threshold”, “Make Binary”, and “Analyze Particles” were applied during the image processing.

**(B)** Detecting callose deposits using ICY – “Spots Detector” module was used.
